# Supplementary material for: A Fe-OSA/Nafion composite film-decorated glassy carbon electrode as a sensor for detection of Pb(ii), Cd(ii) and Cu(ii)
Source: Royal Society of Chemistry journal article supplement (doi:10.1039/c7ay01681f), 2017-01-01
Supplement: c7ay01681f1.pdf [file c7ay01681f1.pdf]

## Supplementary information

### **Fe-OSA/Nafion composite film decorated glassy carbon electrode as a sensor for detection of Pb (II), Cd (II) and Cu (II).**

Haitao Sha<sup>a</sup>, Yunhai Wu<sup>a,\*</sup>, Yiang Fan<sup>b</sup>

<sup>a</sup>Key Laboratory of Integrated Regulation and Resources Development of Shallow Lakes, Ministry of Education, Hohai University, Xikang Road #1, Nanjing, 210098, China

<sup>b</sup>College of Environment, Hohai University, Xikang Road #1, Nanjing, 210098, China

\* Corresponding author: Tel: +86 25 83786697, Fax: +86 25 83786697

E-mail address: [shthhu@163.com](mailto:shthhu@163.com)

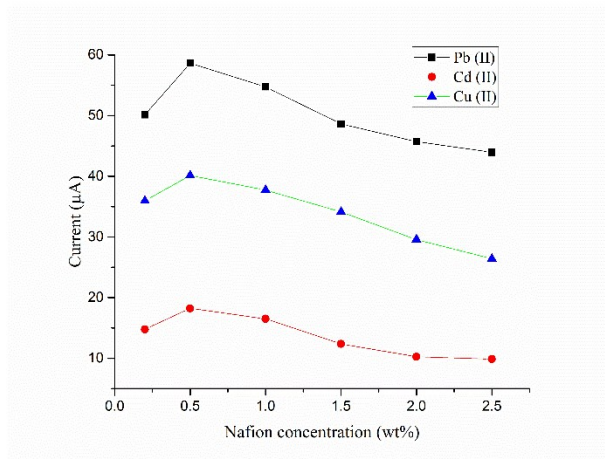

**Fig. S1** Effect of the concentration of Nafion for the peak currents of metal ions.

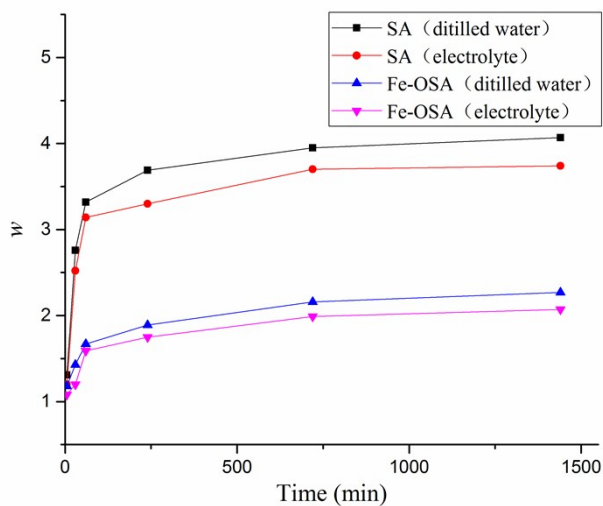

**Fig. S2** The swelling property of SA and Fe-OSA in the water and electrolyte.

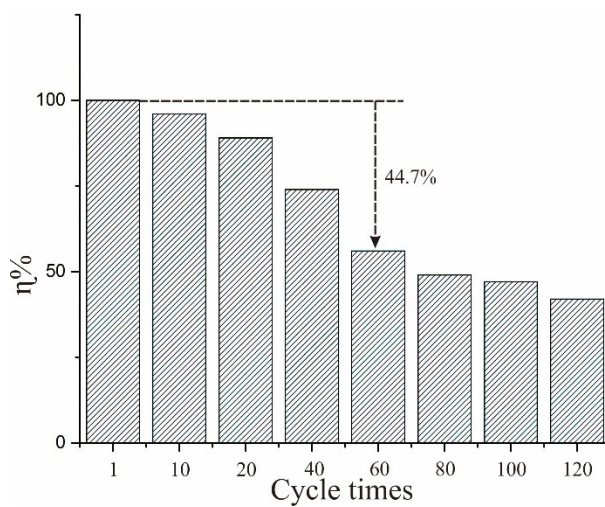

**Fig. S3** The reproducibility of Fe-OSA GCE.

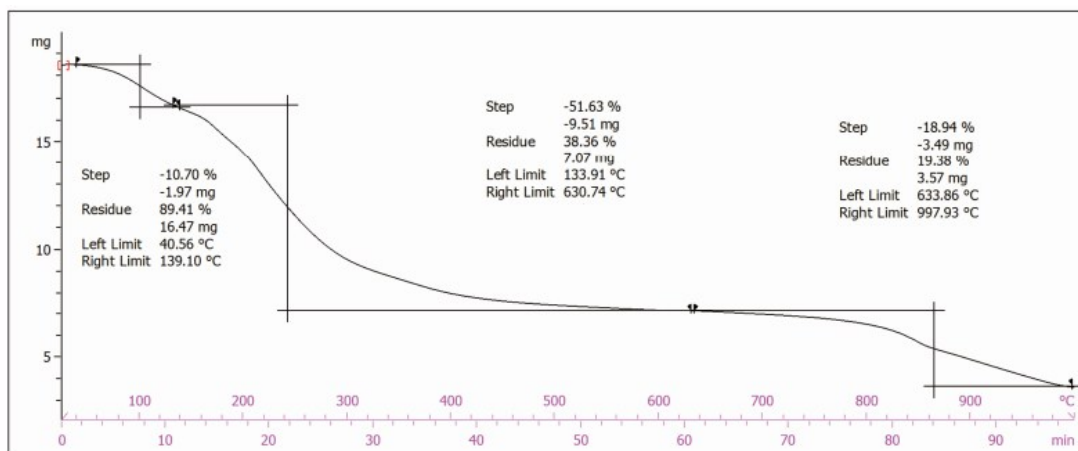

**Fig. S4** The TG curve of Fe-OSA.

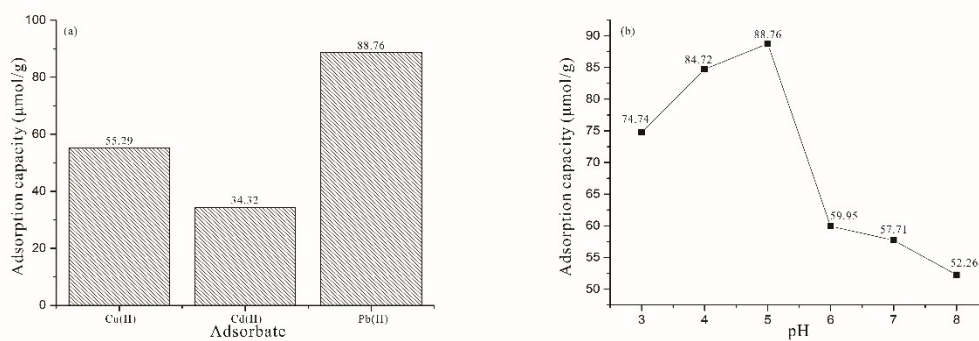

**Fig. S5** The adsorption capacity for Cu (II), Cd (II) and Pb (II) on Fe-OSA(a); and the effect of pH for the adsorption capacity of Pb (II) on Fe-OSA (b).
